# Supplementary material for: The efficiency and safety of high-dose vitamin C in patients with COVID-19: a retrospective cohort study
Source: PubMed Central journal article supplement (PMC7993712; doi:10.18632/aging.202557), 2021-02-26
Supplement: aging-13-202557-s001.pdf [file aging-13-202557-s001.pdf]

**SUPPLEMENTARY FIGURES**

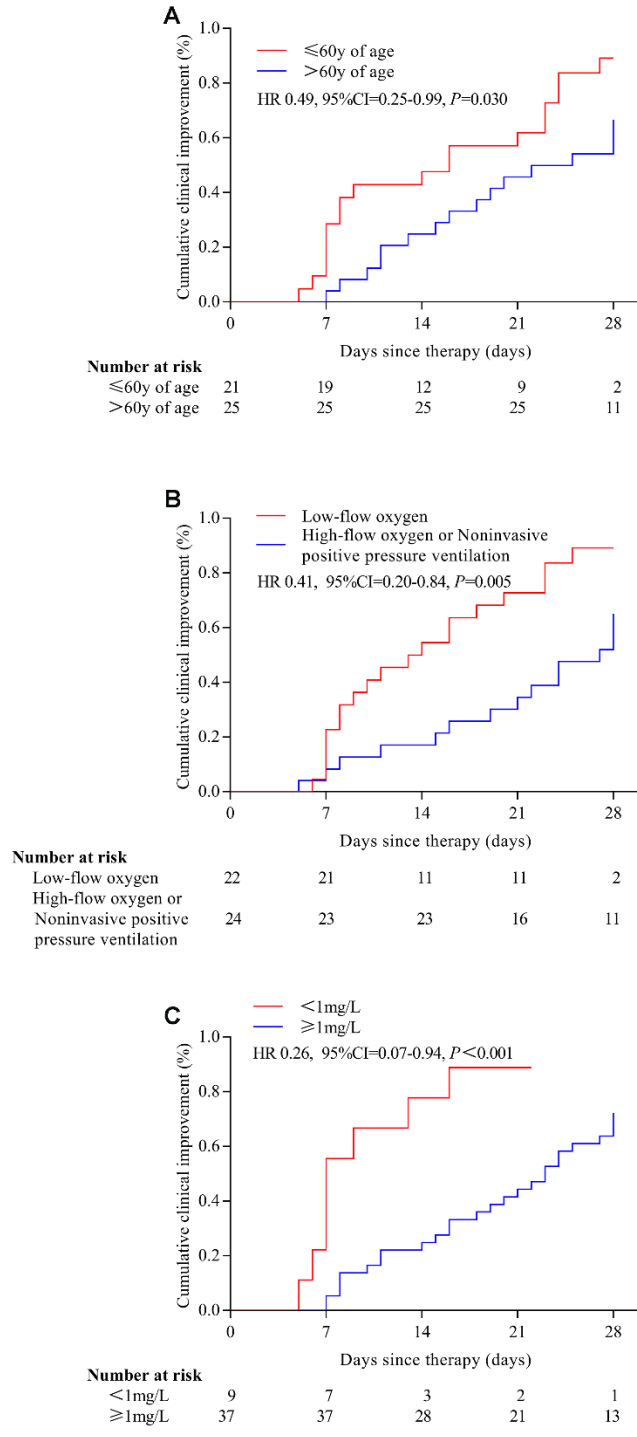

**Supplementary Figure 1. Cumulative incidence of clinical improvement in high-dose vitamin C therapy group.** (A) In the high-dose vitamin C group, clinical improvement was better for patients ≤ 60 years old than others (HR=0.49, 95%CI, 0.25-0.99); (B) In the high-dose vitamin C group, clinical improvement was better for patients who received low-flow oxygen (HR=0.41, 95%CI, 0.20-0.84); (C) In the high-dose vitamin C group, clinical improvement was better for those with serum hs-CRP < 1 mg/L (HR=0.26, 95%CI, 0.07-0.94). Hs-CRP: high-sensitivity C-reactive protein.

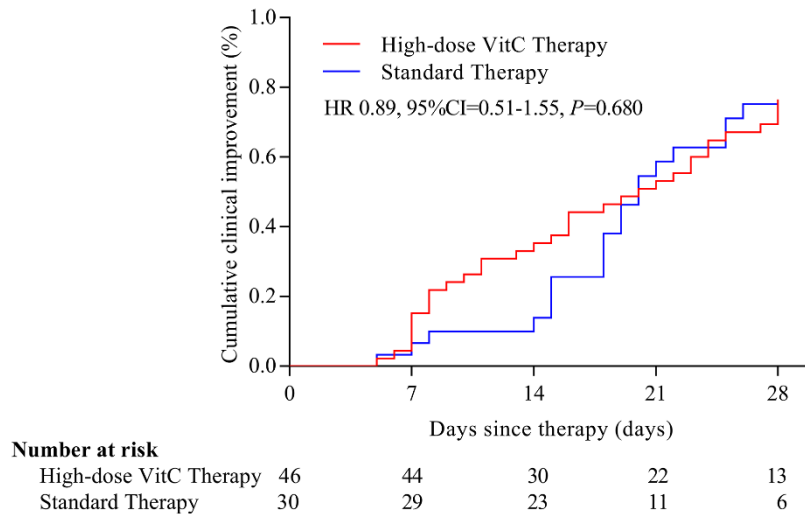

**Supplementary Figure 2. Overall cumulative incidence of clinical improvement.** The clinical improvement between high-dose vitamin C and standard therapy did not significantly differ (HR=0.89, 95%CI, 0.51-1.55). VitC: vitamin C.
